# Supplementary material for: Clinical Evaluation of a Multiplex PCR Assay for Simultaneous Detection of 18 Respiratory Pathogens in Patients with Acute Respiratory Infections
Source: MDPI journal article supplement (doi:10.3390/pathogens12010021), 2022-12-23
Supplement: s1 [file s1]

| Pathogen                     | fluorescent channel | Melting temperature $T_m$ (°C) | MPA tube NO.    |
|------------------------------|---------------------|--------------------------------|-----------------|
| IFA                          |                     | 52.0±1.0                       |                 |
| PIV-3                        | FAM                 | 42.0±1.0                       |                 |
| IFB                          |                     | 33.5±1.0                       |                 |
| PIV-1                        |                     | 54.5±1.0                       |                 |
| CP                           | VIC                 | 48.0±1.0                       | Reaction tube 1 |
| MP                           |                     | 41.0±1.0                       |                 |
| PIV-2                        |                     | 35.0±1.0                       |                 |
| RSV                          |                     | 53.0±1.0                       |                 |
| PIV-4                        | ROX                 | 46.0±1.0                       |                 |
| HRV                          |                     | 39.0±1.0                       |                 |
| HADV                         |                     | 31.0±1.0                       |                 |
| SARS-CoV-2-N                 |                     | 35.0±1.0                       |                 |
| SARS-CoV-2-ORF1ab            | FAM                 | 44.5±1.0                       |                 |
| SARS-CoV-2-N & SARS-CoV-21ab |                     | 35.0±1.0&44.5±1.0              |                 |
| COV-HKU1                     |                     | 35.5±1.0                       | Reaction tube 2 |
| COV-NL63                     | VIC                 | 46.0±1.0                       |                 |
| HBOV                         |                     | 56.0±1.0                       |                 |
| HMPV                         |                     | 36.5±1.0                       |                 |
| COV-OC43                     | ROX                 | 47.5±1.0                       |                 |
| COV-229E                     |                     | 56.5±1.0                       |                 |

**Supplementary Table S1.** Fluorescent channel and Melting temperature of each respiratory pathogen probe

| pathogens            | Viral load<br>( copies/mL ) | Result (+/-) |
|----------------------|-----------------------------|--------------|
| H1N1 ( 2009 )、HADV-1 | 10 <sup>3</sup>             | +            |
| H1N1、HADV-3          | 10 <sup>3</sup>             | +            |
| H3N2、HADV-7          | 10 <sup>3</sup>             | +            |
| H5N1                 | 10 <sup>3</sup>             | +            |
| H7N9                 | 10 <sup>3</sup>             | +            |
| PIV1、229E            | 10 <sup>3</sup>             | +            |
| PIV2、HKU1            | 10 <sup>3</sup>             | +            |
| PIV3、OC43            | 10 <sup>3</sup>             | +            |
| PIV4、NL63            | 10 <sup>3</sup>             | +            |
| IFB-Victoria、RSV-A   | 10 <sup>3</sup>             | +            |
| IFB-Yamagat、RSV-B    | 10 <sup>3</sup>             | +            |
| HBOV、HMPV            | 10 <sup>3</sup>             | +            |
| MP、CP                | 10 <sup>3</sup>             | +            |
| HRV                  | 10 <sup>3</sup>             | +            |

**Supplementary Table S2:** Determination of the limit of detection of the MPA assay

| Infection type | Pathogens    | Number | Percentage (%) |
|----------------|--------------|--------|----------------|
| Mono virus     | IFA          | 11     | 11.58          |
|                | HADV         | 5      | 5.26           |
|                | HMPV         | 1      | 1.05           |
|                | 229E         | 4      | 4.21           |
|                | PIV3         | 2      | 2.11           |
|                | OC43         | 1      | 1.05           |
|                | IFB          | 4      | 4.21           |
|                | RSV          | 4      | 4.21           |
|                | HRV          | 5      | 5.26           |
|                | CP           | 1      | 1.05           |
|                | MP           | 7      | 7.37           |
|                | COVID-19     | 26     | 27.37          |
| Two viruses    | COVID-19+HRV | 2      | 2.11           |
|                | HADV+HRV     | 1      | 1.05           |
|                | HADV+MP      | 2      | 2.11           |
|                | 229E+HRV     | 1      | 1.05           |
|                | PIV2+RSV     | 1      | 1.05           |
|                | RSV+MP       | 13     | 13.68          |
| Triple viruses | HADV+HRV+MP  | 1      | 1.05           |
|                | HADV+RSV+MP  | 1      | 1.05           |
|                | PIV2+RSV+MP  | 2      | 2.11           |

**Supplementary Table S3:** Positive samples with respiratory pathogens confirmed by both the MPA assay and NGS.
